# Supplementary material
Source: PubMed Central journal article supplement (PMC10282376)
Supplement: S1368980014000159sup001.pdf [file S1368980014000159sup001.pdf]

Supplementary table S1: Mean intake of each food item by center and sex

|                          | Apples/pears<br>(g/day) |        | Berries<br>(g/day) |        | Cabbages<br>(g/day) |        | Root vegetables<br>(g/day) |        | Shellfish<br>(g/day) |        | Fish<br>(g/day) |        | Dark bread<br>(g/day) |        |
|--------------------------|-------------------------|--------|--------------------|--------|---------------------|--------|----------------------------|--------|----------------------|--------|-----------------|--------|-----------------------|--------|
|                          | Male                    | Female | Male               | Female | Male                | Female | Male                       | Female | Male                 | Female | Male            | Female | Male                  | Female |
| <b>Norway</b>            | -                       | 56.7   | -                  | 7.4    | -                   | 23.6   | -                          | 34.9   | -                    | 4.2    | -               | 41.2   | -                     | 111.0  |
| South-East of Norway     | -                       | 58.8   | -                  | 8.1    | -                   | 23.9   | -                          | 29.9   | -                    | 3.8    | -               | 34.7   | -                     | 110.0  |
| North-West of Norway     | -                       | 54.1   | -                  | 6.7    | -                   | 23.3   | -                          | 41.3   | -                    | 4.8    | -               | 49.4   | -                     | 112.2  |
| <b>Sweden</b>            | 47.5                    | 54.4   | 5.8                | 6.3    | 13.5                | 15.2   | 18.7                       | 19.8   | 3.1                  | 3.2    | 34.2            | 27.5   | 55.0                  | 41.8   |
| Umeå                     | 44.2                    | 55.0   | 6.9                | 7.1    | 10.5                | 16.1   | 17.1                       | 22.0   | 2.6                  | 2.7    | 31.0            | 25.4   | 57.7                  | 44.2   |
| Malmö                    | 50.7                    | 53.8   | 4.7                | 5.5    | 16.3                | 14.4   | 20.3                       | 17.7   | 3.6                  | 3.7    | 37.3            | 29.5   | 52.5                  | 39.4   |
| <b>Denmark</b>           | 80.0                    | 87.5   | 3.0                | 2.7    | 17.3                | 19.8   | 20.5                       | 25.8   | 4.0                  | 3.4    | 40.5            | 33.9   | 134.6                 | 110.4  |
| Aarhus                   | 102.3                   | 124.5  | 2.6                | 3.2    | 16.9                | 18.2   | 20.8                       | 28.9   | 3.1                  | 3.7    | 41.8            | 29.3   | 139.1                 | 121.0  |
| Copenhagen               | 70.6                    | 74.8   | 3.2                | 2.6    | 17.5                | 20.3   | 20.4                       | 24.7   | 4.4                  | 3.3    | 40.0            | 35.5   | 132.7                 | 106.7  |
| <b>Great Britain</b>     | 69.6                    | 56.5   | 7.6                | 8.7    | 30.1                | 30.2   | 26.6                       | 26.0   | 2.1                  | 1.7    | 25.4            | 22.8   | 63.4                  | 49.0   |
| Cambridge                | 59.9                    | 57.9   | 6.2                | 6.0    | 26.1                | 33.1   | 25.3                       | 28.6   | 3.0                  | 2.6    | 35.3            | 26.3   | 43.2                  | 41.8   |
| Oxford, general popl.    | 74.7                    | 49.1   | 4.8                | 9.1    | 31.0                | 24.6   | 29.3                       | 24.2   | 1.9                  | 1.3    | 24.3            | 27.0   | 58.7                  | 39.1   |
| Oxford, health conscious | 84.5                    | 63.1   | 13.9               | 12.5   | 37.6                | 32.4   | 26.3                       | 24.2   | 0.0                  | 0.8    | 5.0             | 12.2   | 113.8                 | 72.3   |

|                      |       |       |      |      |      |      |      |      |     |      |       |      |       |      |
|----------------------|-------|-------|------|------|------|------|------|------|-----|------|-------|------|-------|------|
| <b>Netherlands</b>   | 52.8  | 74.7  | 4.8  | 8.5  | 23.6 | 23.3 | 9.1  | 11.4 | 2.4 | 1.1  | 15.5  | 13.3 | 123.2 | 87.6 |
| Bilthoven            | 52.8  | 58.3  | 4.82 | 5.3  | 23.6 | 22.1 | 9.1  | 10.6 | 2.4 | 1.4  | 15.5  | 11.7 | 123.2 | 85.1 |
| Utrecht              | -     | 86.9  | -    | 10.9 | -    | 24.1 | -    | 11.9 | -   | 0.8  | -     | 14.4 | -     | 89.4 |
| <b>Germany</b>       | 87.0  | 84.5  | 9.7  | 14.0 | 23.2 | 25.5 | 16.9 | 20.2 | 1.0 | 1.1  | 20.45 | 16.4 | 105.8 | 76.3 |
| Potsdam              | 98.6  | 92.7  | 13.8 | 12.5 | 24.6 | 26.2 | 15.5 | 21.1 | 0.4 | 0.2  | 24.1  | 19.7 | 113.0 | 78.5 |
| Heidelberg           | 73.1  | 76.5  | 4.9  | 15.4 | 21.6 | 24.8 | 18.6 | 19.4 | 1.6 | 2.0  | 16.1  | 13.1 | 97.2  | 74.1 |
| <b>France</b>        | -     | 88.7  | -    | 15.1 | -    | 15.5 | -    | 27.7 | -   | 6.6  | -     | 34.4 | -     | 39.9 |
| Ile-de-France        | -     | 88.5  | -    | 14.0 | -    | 17.8 | -    | 30.4 | -   | 6.1  | -     | 37.6 | -     | 43.6 |
| North-West of France | -     | 93.9  | -    | 14.1 | -    | 11.4 | -    | 33.6 | -   | 13.4 | -     | 40.1 | -     | 34.7 |
| North-East of France | -     | 82.5  | -    | 17.6 | -    | 14.4 | -    | 28.2 | -   | 5.0  | -     | 29.4 | -     | 40.0 |
| Rhone-Alpes/Auvergne | -     | 88.1  | -    | 21.5 | -    | 16.9 | -    | 25.4 | -   | 3.3  | -     | 30.0 | -     | 41.4 |
| Provence/Languedoc   | -     | 87.7  | -    | 10.2 | -    | 13.8 | -    | 21.5 | -   | 7.4  | -     | 35.9 | -     | 36.1 |
| South-West of France | -     | 97.2  | -    | 7.3  | -    | 16.7 | -    | 24.9 | -   | 7.6  | -     | 35.0 | -     | 39.1 |
| <b>Greece</b>        | 73.1  | 61.0  | 0.8  | 0.5  | 13.9 | 11.7 | 8.3  | 10.1 | 6.2 | 5.8  | 47.4  | 27.1 | 154.6 | 91.7 |
| <b>Italy</b>         | 156.1 | 114.4 | 5.0  | 6.6  | 16.3 | 12.8 | 10.5 | 10.5 | 5.1 | 3.3  | 25.7  | 18.2 | 27.2  | 14.2 |
| Varese               | 127.9 | 122.4 | 2.0  | 4.1  | 15.2 | 7.8  | 12.9 | 9.8  | 1.0 | 3.2  | 19.7  | 17.4 | 15.5  | 12.6 |

|                                   |             |             |             |            |             |             |             |             |            |            |             |             |             |              |
|-----------------------------------|-------------|-------------|-------------|------------|-------------|-------------|-------------|-------------|------------|------------|-------------|-------------|-------------|--------------|
| Turin                             | 172.4       | 125.2       | 7.3         | 12.7       | 18.4        | 16.0        | 11.5        | 13.9        | 4.9        | 2.4        | 29.2        | 18.3        | 21.0        | 15.8         |
| Florence                          | 160.1       | 115.3       | 5.0         | 7.3        | 17.3        | 12.8        | 10.6        | 11.1        | 9.2        | 3.1        | 28.4        | 17.5        | 16.5        | 13.1         |
| Naples                            | -           | 83.8        | -           | 6.1        | -           | 20.3        | -           | 10.1        | -          | 4.3        | -           | 19.0        | -           | 9.5          |
| Ragusa                            | 139.2       | 121.2       | 2.0         | 0.9        | 7.9         | 11.3        | 1.8         | 3.8         | 7.5        | 4.5        | 18.8        | 23.9        | 92.7        | 39.9         |
| <b>Spain</b>                      | 144.0       | 119.3       | 3.6         | 4.6        | 10.3        | 10.6        | 9.0         | 8.9         | 11.4       | 8.1        | 85.2        | 54.5        | 10.1        | 12.7         |
| Asturias                          | 160.6       | 155.9       | 6.6         | 5.3        | 15.3        | 11.4        | 7.9         | 5.7         | 15.6       | 6.6        | 88.1        | 61.0        | 13.3        | 15.8         |
| San Sebastian                     | 178.8       | 155.9       | 5.2         | 8.9        | 10.5        | 13.9        | 11.2        | 14.2        | 6.4        | 7.7        | 113.8       | 67.7        | 8.2         | 14.9         |
| Navarra                           | 111.0       | 90.5        | 1.6         | 3.7        | 6.8         | 11.2        | 6.8         | 5.3         | 12.9       | 7.7        | 71.9        | 58.5        | 6.8         | 10.4         |
| Murcia                            | 131.1       | 97.4        | 0.7         | 3.3        | 15.4        | 13.7        | 11.7        | 12.0        | 11.1       | 6.6        | 58.7        | 45.5        | 9.7         | 8.9          |
| Granada                           | 117.6       | 98.4        | 2.2         | 2.7        | 2.0         | 3.5         | 7.7         | 7.9         | 12.8       | 12.1       | 72.0        | 42.3        | 15.8        | 13.7         |
| <b>All centers/<br/>countries</b> | <b>87.3</b> | <b>80.8</b> | <b>5.13</b> | <b>8.5</b> | <b>17.2</b> | <b>18.1</b> | <b>14.7</b> | <b>19.9</b> | <b>4.4</b> | <b>3.9</b> | <b>37.9</b> | <b>27.9</b> | <b>83.6</b> | <b>60.76</b> |

| <i>Supplementary table s2: Main dietary components contributing to the 7 included dietary categories, by country (cut-off value: 5%)</i> |                                                                                                                                                                                                 |
|------------------------------------------------------------------------------------------------------------------------------------------|-------------------------------------------------------------------------------------------------------------------------------------------------------------------------------------------------|
| <b>Norway</b>                                                                                                                            |                                                                                                                                                                                                 |
| Apples/pears                                                                                                                             | Apple (79.66%), pear (20.34%)                                                                                                                                                                   |
| Berries                                                                                                                                  | Strawberry (38.26%), cowberry (23.48%), blueberry (11.30%), currant, red (6.96%), raspberry (6.96%), cloudberry (5.22%)                                                                         |
| Cabbages                                                                                                                                 | Cabbage, Chinese (35.38%), cabbage, white (22.51%), broccoli (17.30%), cauliflower (10.41%), cabbage, sauerkraut (7.96%)                                                                        |
| Dark Bread                                                                                                                               | Wholemeal bread, coarse (29.11%), bread, kneipp (20.02%), bread, multigrain (8.56%), wholemeal bread, extra coarse (6.02%), bread, wholemeal 50%, with water (5.53%), bread roll, whole (5.09%) |
| Fish                                                                                                                                     | Salmon (15.11%), mackerel, atlantic (14.23%), cod (14.11%), herring, atlantic (12.86%), fish pudding (5.99%)                                                                                    |
| Shellfish                                                                                                                                | Shrimp (82.71%)                                                                                                                                                                                 |
| Root vegetables                                                                                                                          | Carrot (64.80%), swede (12.10%), beetroot (10.72%), celery root (celeriac) (8.98%)                                                                                                              |
| <b>Sweden</b>                                                                                                                            |                                                                                                                                                                                                 |
| Apples/pears                                                                                                                             | Apple (77.60%), pear (22.40%)                                                                                                                                                                   |
| Berries                                                                                                                                  | Strawberry (28.24%), raspberry (20.59%), blueberry (18.47%), currant, black (9.77%), currant, red (5.94%), cloudberry (5.31%)                                                                   |
| Cabbages                                                                                                                                 | Cabbage, white (51.98%), broccoli (19.16%), cauliflower (10.91%), cabbage, Chinese (10.75%),                                                                                                    |
| Dark Bread                                                                                                                               | Wasa husman (19.29%), coarse rye bread (16.33%), wholemeal bread (13.97%), bread with coarse flour, non-specified (6.89%), wasa sport, rye (5.12%)                                              |
| Fish                                                                                                                                     | Herring, atlantic (26.30%), salmon (20.48%), cod (16.84%),                                                                                                                                      |
| Shellfish                                                                                                                                | Shrimp (85.74%), mussels (7.13%)                                                                                                                                                                |
| Root vegetables                                                                                                                          | Carrot (68.09%), beetroot (13.66%),                                                                                                                                                             |
| <b>Denmark</b>                                                                                                                           |                                                                                                                                                                                                 |
| Apples/pears                                                                                                                             | Apple (79.66%), pear (20.34%)                                                                                                                                                                   |
| Berries                                                                                                                                  | Strawberry (56.41%), raspberry (12.82%), red currant (5.98%), lingonberry (5.98%), blackberry (5.13%)                                                                                           |
| Cabbages                                                                                                                                 | Broccoli (28.46%), cabbage, red (21.65%), cauliflower (16.16%), cabbage, white (14.74%), cabbage, chinese (8.64%), brussel sprouts (5.89%)                                                      |
| Dark Bread                                                                                                                               | Bread, rye, wholemeal (55.23%), bread, coarse, non-specified (18.51%), roll, wholemeal (7.44%), bread, rye, dark (5.53%)                                                                        |

|                        |                                                                                                                                                                                         |
|------------------------|-----------------------------------------------------------------------------------------------------------------------------------------------------------------------------------------|
| Fish                   | Herring, marinated (25.35%), mackerel (11.26%), salmon (9.83%), tuna (8.18%), herring, non-specified (7.01%), fish meat ball (5.74%),                                                   |
| Shellfish              | Shrimp (69.91%), crab (15.74%),                                                                                                                                                         |
| Root vegetables        | Carrot (65.45%), beetroot (23.03%), horseradish (5.33%)                                                                                                                                 |
| <b>Great Britain</b>   |                                                                                                                                                                                         |
| Apples/pears           | Apple, eating (66.94%), pear (22.54%), apple, cooking (5.95%)                                                                                                                           |
| Berries                | Strawberry (51.43%), raspberry (18.10%), blackberry (10.48%), cranberry (6.67%)                                                                                                         |
| Cabbages               | Broccoli (31.59%), cauliflower (21.84%), cabbage, not specified (14.26%), Cabbage, green (11.55%), brussel sprouts (8.66%)                                                              |
| Dark Bread             | Bread, wholemeal (52.28%), bread, granary (11.87%), bread, brown, non-specified (10.33%),                                                                                               |
| Fish                   | Tuna (21.17%), cod (20.55%), haddock (8.28%), salmon, pink (canned) (6.13%), salmon, red (canned) (5.21%),                                                                              |
| Shellfish              | Prawns (71.67%), crab (6.67%), mussels (6.67%), scallops (5.00%), scampi (5.00%)                                                                                                        |
| Root vegetables        | Carrot (72.93%), beetroot (8.70%), swede (5.52%)                                                                                                                                        |
| <b>The Netherlands</b> |                                                                                                                                                                                         |
| Apples/pears           | Apple (86.43%), pear (11.90%)                                                                                                                                                           |
| Berries                | Strawberry (74.15%), redcurrant (9.75%), raspberry (5.30%)                                                                                                                              |
| Cabbages               | Cauliflower (23.63%), broccoli (13.74%), cabbage, white (11.72%), cabbage, green (10.66%), cabbage, oxheart (10.66%), cabbage, sauerkraut (8.93%), brussel sprouts 8.45%), kale (5.76%) |
| Dark Bread             | Bread, wholemeal (32.28%), bread, brown (27.30%), bread, of seven cereals (5.87%), Dutch rusks, non-specified (5.83%)                                                                   |
| Fish                   | Salmon (24.44%), herring (15.64%), tuna (12.22%), codfish (7.88%)                                                                                                                       |
| Shellfish              | Shrimps (65.59%), mussels (15.59%), crab (11.29%)                                                                                                                                       |
| Root vegetables        | Carrot (61.71%), celeriac 817.31%), radish, red/white (8.55%), beetroot (8.45%)                                                                                                         |
| <b>Germany</b>         |                                                                                                                                                                                         |
| Apples/pears           | Apple (89.98%), pear (9.98%)                                                                                                                                                            |
| Berries                | Strawberry (59.07%), raspberry (8.58%), blueberry (6.86%), redcurrant (6.62%),                                                                                                          |
| Cabbages               | Cauliflower (20.53%), cabbage, sauerkraut (19.43%), cabbage, white (19.32%), cabbage, red (16.36%), broccoli (11.64%), brussel sprouts (6.04%)                                          |

|                 |                                                                                                                                                                                          |
|-----------------|------------------------------------------------------------------------------------------------------------------------------------------------------------------------------------------|
| Dark Bread      | Bread, mixed grain, rye (30.32%), bread, mixed grain, wheat (11.39%), bread, multigrain (9.50%), bread, wholemeal, rye (9.49%), bread, wholemeal, multigrain (6.66%), bread, rye (6.00%) |
| Fish            | Salmon (17.73%), herring (15.10%), matjeshering (9.00%), fish, non-specified (6.79%), coley/saithe (6.65%), trout (brown + rainbow) (5.82%), tuna (5.12%)                                |
| Shellfish       | Shrimp (55.71%), prawn (18.57%), cuttlefish (10.00%), molluscs, non-specified (5.71%)                                                                                                    |
| Root vegetables | Carrot (52.16%), radish, red (19.15%), kohlrabi (9.45%), radish, black (6.38%), celeriac (5.39%)                                                                                         |
| <b>France</b>   |                                                                                                                                                                                          |
| Apples/pears    | Apple (82.22%), pear (17.71%)                                                                                                                                                            |
| Berries         | Strawberry (72.04%), raspberry (19.21%)                                                                                                                                                  |
| Cabbages        | Cauliflower (34.29%), Broccoli (21.75%), Cabbage, sauerkraut (12.70%), Cabbage, green (10.32%), Cabbage, red (7.30%), Cabbage, white (6.51%), brussel sprouts (5.40%)                    |
| Dark Bread      | Bread, countrystyle (44.03%), bread, wholemeal (25.17%), bread, cereals (9.42%)                                                                                                          |
| Fish            | Salmon (17.53%), tuna (13.53%), cod (8.29%), hake (5.00%)                                                                                                                                |
| Shellfish       | Prawn (25.81%), mussel (17.27%), squid (8.73%), oyster (6.64%), gamba (6.64%), crab (5.69%)                                                                                              |
| Root vegetables | Carrot (55.03%), beetroot (13.74%), Radish, red (13.40%), celeriac (8.74%), turnip (5.81%)                                                                                               |
| <b>Greece</b>   |                                                                                                                                                                                          |
| Apples/pears    | Apple, eating (66.48%), pear (17.37%), apple, sour (14.50%)                                                                                                                              |
| Berries         | Strawberry (70.00%), berries, not specified (20.00%), blackberry (10.00%)                                                                                                                |
| Cabbages        | Cabbage, white (57.91%), cauliflower (16.88%), sauerkraut (12.39%), broccoli (8.12%)                                                                                                     |
| Dark Bread      | Bread, wheat, brown (68.21%), bread, wheat, wholemeal (18.57%)                                                                                                                           |
| Fish            | Sardine (10.46%), Anchovy (9.35%), cod (9.35%), fish, non-specified (7.26%), fish, semi-fat, non-specified (5.17%)                                                                       |
| Shellfish       | Shrimp (23.04%), octopus (20.94%), squid (19.90%), cuttlefish (12.04%), cockle (7.33%)                                                                                                   |
| Root vegetables | Carrot (86.49%), beetroot (8.07%)                                                                                                                                                        |
| <b>Italy</b>    |                                                                                                                                                                                          |
| Apples/pears    | Apple (74.35%), pear (25.62%)                                                                                                                                                            |
| Berries         | Strawberry (88.29%),                                                                                                                                                                     |
| Cabbages        | Cauliflower (32.22%), cabbage, savoy (23.17%), Cabbage, red (17.84%), broccoli (16.64%),                                                                                                 |
| Dark Bread      | Bread, wholemeal (43.84%), bread, wholegrain (22.53%), wholemeal crispbread (19.51%)                                                                                                     |

|                      |                                                                                                                                                                                     |
|----------------------|-------------------------------------------------------------------------------------------------------------------------------------------------------------------------------------|
| Fish                 | Tuna (22.86%), anchovy (15.35%), cod (13.49%), salmon (7.72%), trout, brown (6.59%)                                                                                                 |
| Shellfish            | Squid (15.43%), shrimp (14.29%), octopus (12.86%), cuttlefish (12.86%), mussels (8.86%), clam (8.29%), molluscs, non-specified (5.14%)                                              |
| Root vegetables      | Carrot (86.87%), radish, red (7.26%),                                                                                                                                               |
| <b>Spain</b>         |                                                                                                                                                                                     |
| Apples/pears         | Apple (71.57%), pear (28.00%)                                                                                                                                                       |
| Berries              | Strawberry (99.21%)                                                                                                                                                                 |
| Cabbages             | Cauliflower (40.76%), Cabbage, green (23.57%), Cabbage, normal (14.97), brussel spouts (12.42%)                                                                                     |
| Dark Bread           | Bread, wholemeal (61.18%), crispbread, wholemeal, commercial (28.03%), bread, English, wholemeal (6.45%)                                                                            |
| Fish                 | Tuna (21.05%), hake or sea pike (merluccius merluccius) (13.04%), cod (9.31%), anchovies (8.30%), small hake/whiting placide fish (6.37%), sardine (6.29%), atlantic bonito (5.95%) |
| Shellfish            | Prawn (3.79%), squid (0.70%), clam (12.75%), mussels (7.63%), long-finned squid (6.64%), molluscs, non-specified (5.23%)                                                            |
| Root vegetables      | Carrot (85.46%)                                                                                                                                                                     |
| <b>All countries</b> |                                                                                                                                                                                     |
| Apples/pears         | Apple (64.47%), pear (18.85%), apple, eating (11.71%)                                                                                                                               |
| Berries              | Strawberry (62.12%), raspberry (12.04%),                                                                                                                                            |
| Cabbages             | Cabbage, white (2.03%), cauliflower (20.96%), broccoli (18.08%), cabbage, red (7.72%), cabbage, Chinese (6.56%)                                                                     |
| Dark Bread           | Bread, rye, wholemeal (8.95%), bread, wheat, brown (7.34%), bread, wholemeal (5.15%)                                                                                                |
| Fish                 | Salmon (11.81%), tuna (10.85%), Cod (8.34%),                                                                                                                                        |
| Shellfish            | Shrimp (30.32%), Prawn (13.54%), squid (9.31%)                                                                                                                                      |
| Root vegetables      | Carrot (67.4%), beetroot (11.36%), radish, red (5.97%)                                                                                                                              |
